# Supplementary material
Source: PubMed Central journal article supplement (PMC4696896)
Supplement: NIHMS731484-supplement-2.pdf [file NIHMS731484-supplement-2.pdf]

Corresponding Author: Tae-Kyung Kim

Manuscript Number: NN-A52399A

Manuscript Type: Article

# Main Figures: 7

# Supplementary Figures: 16

# Supplementary Tables: 0

# Supplementary Videos: 0

## Reporting Checklist for Nature Neuroscience

This checklist is used to ensure good reporting standards and to improve the reproducibility of published results. For more information, please read [Reporting Life Sciences Research](#).

Please note that in the event of publication, it is mandatory that authors include all relevant methodological and statistical information in the manuscript.

### ► Statistics reporting, by figure

- Please specify the following information for each panel reporting quantitative data, and where each item is reported (section, e.g. Results, & paragraph number).
- Each figure legend should ideally contain an exact sample size (n) for each experimental group/condition, where n is an exact number and not a range, a clear definition of how n is defined (for example x cells from x slices from x animals from x litters, collected over x days), a description of the statistical test used, the results of the tests, any descriptive statistics and clearly defined error bars if applicable.
- For any experiments using custom statistics, please indicate the test used and stats obtained for each experiment.
- Each figure legend should include a statement of how many times the experiment shown was replicated in the lab; the details of sample collection should be sufficiently clear so that the replicability of the experiment is obvious to the reader.
- For experiments reported in the text but not in the figures, please use the paragraph number instead of the figure number.

**Note:** Mean and standard deviation are not appropriate on small samples, and plotting independent data points is usually more informative. When technical replicates are reported, error and significance measures reflect the experimental variability and not the variability of the biological process; it is misleading not to state this clearly.

|                            |                 | TEST USED             |              | n                                  |                       |                             | DESCRIPTIVE STATS (AVERAGE, VARIANCE) |             | P VALUE               |                 | DEGREES OF FREEDOM & F/t/z/R/ETC VALUE |  |
|----------------------------|-----------------|-----------------------|--------------|------------------------------------|-----------------------|-----------------------------|---------------------------------------|-------------|-----------------------|-----------------|----------------------------------------|--|
| FIGURE NUMBER              | WHICH TEST?     | SECTION & PARAGRAPH # | EXACT VALUE  | DEFINED?                           | SECTION & PARAGRAPH # | REPORTED?                   | SECTION & PARAGRAPH #                 | EXACT VALUE | SECTION & PARAGRAPH # | VALUE           | SECTION & PARAGRAPH #                  |  |
| example<br>1a              | one-way ANOVA   | Fig. legend           | 9, 9, 10, 15 | mice from at least 3 litters/group | Methods para 8        | error bars are mean +/- SEM | Fig. legend                           | p = 0.044   | Fig. legend           | F(3, 36) = 2.97 | Fig. legend                            |  |
| example<br>results, para 6 | unpaired t-test | Results para 6        | 15           | slices from 10 mice                | Results para 6        | error bars are mean +/- SEM | Results para 6                        | p = 0.0006  | Results para 6        | t(28) = 2.808   | Results para 6                         |  |
| +<br>-                     |                 |                       |              |                                    |                       |                             |                                       |             |                       |                 |                                        |  |

| TEST USED     |                                                                   | n                     |             |                                                                                                                                                                                          | DESCRIPTIVE STATS (AVERAGE, VARIANCE) |                             | P VALUE               |                                                                                                                                                                                                                                                                                                                                                                                                                                                                                                                                                                                 | DEGREES OF FREEDOM & F/t/z/R/ETC VALUE |       |                       |
|---------------|-------------------------------------------------------------------|-----------------------|-------------|------------------------------------------------------------------------------------------------------------------------------------------------------------------------------------------|---------------------------------------|-----------------------------|-----------------------|---------------------------------------------------------------------------------------------------------------------------------------------------------------------------------------------------------------------------------------------------------------------------------------------------------------------------------------------------------------------------------------------------------------------------------------------------------------------------------------------------------------------------------------------------------------------------------|----------------------------------------|-------|-----------------------|
| FIGURE NUMBER | WHICH TEST?                                                       | SECTION & PARAGRAPH # | EXACT VALUE | DEFINED?                                                                                                                                                                                 | SECTION & PARAGRAPH #                 | REPORTED?                   | SECTION & PARAGRAPH # | EXACT VALUE                                                                                                                                                                                                                                                                                                                                                                                                                                                                                                                                                                     | SECTION & PARAGRAPH #                  | VALUE | SECTION & PARAGRAPH # |
| 1b            | unpaired t-test                                                   | Fig. 1b legend        | 3,3,3,3,3,3 | For each group of eRNA and mRNA level post KCl stimulation, n=3. 2.5 million cultured cortical neurons were used in each of the three trials and measured at four different time-points. | Fig. 1b legend                        | error bars are mean +/- SEM | Fig. 1b legend        |                                                                                                                                                                                                                                                                                                                                                                                                                                                                                                                                                                                 |                                        |       |                       |
| 2a            | Student's unpaired t-test / unpaired t-test with Welch correction | Fig. 2a legend        | 3,3,3,3,3   | For c-fos mRNA fold induction and mRNA level, 2.5 million cultured cortical neurons were used in each of the four stimulation groups (Un, KCl, BDNF, Forskolin).                         | Fig. 2a legend                        | error bars are mean +/- SEM | Fig. 2a legend        | mRNA level:<br>p=0.0418<br>t(2)=4.736<br>p=0.0333<br>t(2)=5.339<br>p=0.0448<br>t(2)=4.566<br>c-fos eRNA:<br>KCl:<br>e1 p=0.0418<br>t(4)=6.654<br>F=10.187<br>(sdP=0.0894)<br>e2 p=0.008<br>t(4)=11.103<br>F=3.149<br>(sdP=0.3267)<br>e5 p=0.0264<br>t(4)=3.436<br>F=26.341<br>(sdP=0.0566)<br>BDNF:<br>e1 p=0.0329<br>t(4)=3.200<br>F=16.876<br>(sdP=0.0559)<br>e4 p=0.0271<br>t(4)=3.408<br>H=17.578<br>(sdP=0.0538)<br>e5 p=0.0214<br>t(2)=6.72<br>Forskolin:<br>e1 p=0.0498<br>t(4)=2.718<br>F=6.333<br>(sdP=0.1364)<br>e5 p=0.0485<br>t(4)=2.805<br>F=4.048<br>(sdP=0.1981) | Fig. 2a legend                         |       |                       |

|        |    |                                                                   |                |             |                                                                                                                      |                |                             |                |                                                                                                                                                                                                                                                                                                                                                                                                                                                                                                                                                                                                                                                                                                      |                |  |  |
|--------|----|-------------------------------------------------------------------|----------------|-------------|----------------------------------------------------------------------------------------------------------------------|----------------|-----------------------------|----------------|------------------------------------------------------------------------------------------------------------------------------------------------------------------------------------------------------------------------------------------------------------------------------------------------------------------------------------------------------------------------------------------------------------------------------------------------------------------------------------------------------------------------------------------------------------------------------------------------------------------------------------------------------------------------------------------------------|----------------|--|--|
| +<br>- | 2b | unpaired t-test with Welch correction                             | Fig. 2b legend | 3,3,3       | For each stimulation group (KCl, BDNF, Forskolin) n=3 consisting of 2.5 million cultured cortical neurons.           | Fig. 2b legend | error bars are mean +/- SEM | Fig. 2b legend | <p>KCl:<br/>e1 p=0.0242<br/>t(3)=6.306<br/>e2 p=0.0103<br/>t(3)=5.784<br/>e5 p=0.0191<br/>t(2)=7.140<br/>BDNF:<br/>e1 p=0.0350<br/>t(2)=5.207<br/>e4 p=0.0056<br/>t(2)13.349<br/>e5 p=0.0391<br/>t(2)4.907<br/>Forskolin:<br/>e1 p=0.0087<br/>t(2)=10.63<br/>e5 p=0.0438<br/>t(2)=4.618</p>                                                                                                                                                                                                                                                                                                                                                                                                          | Fig. 2b legend |  |  |
| +<br>- | 2c | Student's unpaired t-test / unpaired t-test with Welch correction | Fig. 2c legend | 3,5,2,2,2,3 | For each stimulation group (KCl, BDNF, Forskolin) n=3,5,2,2,2,3 consisting of 2.5 million cultured cortical neurons. | Fig. 2c legend | error bars are mean +/- SEM | Fig. 2c legend | <p>KCl:<br/>e1 vs. e1+e2+e4+d5<br/>p=0.0001<br/>t(5)=12.256<br/>e1 vs. e1+e2+e5<br/>p=0.0246<br/>t(2)=6.259<br/>e1+e2+e4+e5 vs. e1+e4+e5<br/>p=0.0240<br/>t(2)=6.576<br/>e1+e2+e4+e5 vs. e1+e5<br/>p=0.0128<br/>t(2)=8.764<br/>BDNF:<br/>e1 vs. e1+e2+e4+d5<br/>p=0.0007<br/>t(7)=5.818<br/>e1+e2+e4+e5 vs. e1+e2+e5<br/>p=0.0034<br/>t(3)=8.537<br/>F=1.411<br/>(sdP=0.3569)<br/>e1 vs. e1+e4+e5<br/>p=0.0004<br/>t(3)=18.125<br/>F=6.346<br/>(sdP=0.1280)<br/>e1+e2+e4+e5 vs. e1+e5<br/>p=0.0030<br/>t(3)=2.822<br/>F=63.970<br/>(sdP=0.0946)<br/>Forskolin:<br/>e1 vs. e1+e2+e4+d5<br/>p=0.0001<br/>t(5)=12.601<br/>e1 vs. e1+e2+e5<br/>p=0.0189<br/>t(2)=7.164<br/>F=126.28<br/>(sdP=0.0565)</p> | Fig. 2c legend |  |  |

|        |    |                                                                   |                |       |                                                                                                                                                                        |                |                             |                |                                                                                                                                                                                            |                |  |  |
|--------|----|-------------------------------------------------------------------|----------------|-------|------------------------------------------------------------------------------------------------------------------------------------------------------------------------|----------------|-----------------------------|----------------|--------------------------------------------------------------------------------------------------------------------------------------------------------------------------------------------|----------------|--|--|
| +<br>- | 3b | Student's unpaired t-test / unpaired t-test with Welch correction | Fig. 3b legend | 3,5   | Three trials of 3C analysis for enhancer 1,2 and the promoter both before, and after KCl stimulation.                                                                  | Fig. 3b legend | error bars are mean +/- SEM | Fig. 3b legend | KCl :<br>B[e1]<br>p=0.0452<br>t(2)=4.545<br>C[e2]<br>p=0.0109<br>t(4)=4.492<br>F=5.459<br>(sdP=0.1548)                                                                                     |                |  |  |
| +<br>- | 3c | unpaired t-test with Welch correction                             | Fig. 3c legend | 3     | Three trials of 3C analysis for enhancer 1,2 and the promoter both before, and after BDNF stimulation.                                                                 | Fig. 3c legend | error bars are mean +/- SEM | Fig. 3c legend | BDNF :<br>B[e1]<br>p=0.0482<br>t(2)=4.389                                                                                                                                                  |                |  |  |
| +<br>- | 3d | Student's unpaired t-test                                         | Fig. 3d legend | 3     | Three trials of 3C analysis for enhancer 1,2 and the promoter both before, and after Forskolin stimulation.                                                            | Fig. 3d legend | error bars are mean +/- SEM | Fig. 3d legend | Forskolin:<br>B[e1]<br>p=0.0016<br>t(2)=7.132<br>F=49.091<br>(sdP=0.0903)                                                                                                                  |                |  |  |
| +<br>- | 3f | unpaired t-test with Welch correction                             | Fig. 3f legend | 3     | Three trials of 3C analysis for enhancer 5 and the promoter before and after KCl stimulation.                                                                          | Fig. 3f legend | error bars are mean +/- SEM | Fig. 3f legend | KCl :<br>F[e5]<br>p=0.0492<br>t(2)=3.554                                                                                                                                                   |                |  |  |
| +<br>- | 3g | Student's unpaired t-test                                         | Fig. 3g legend | 3     | Three trials of 3C analysis for enhancer 5 and the promoter before and after BDNF stimulation.                                                                         | Fig. 3g legend | error bars are mean +/- SEM | Fig. 3g legend | BDNF :<br>F[e5]<br>p=0.0001<br>t(4)=14.393<br>F=2.872<br>(sdP=0.2583)                                                                                                                      |                |  |  |
| +<br>- | 3h | Student's unpaired t-test                                         | Fig. 3h legend | 3     | Three trials of 3C analysis for enhancer 5 and the promoter before and after Forskolin stimulation.                                                                    | Fig. 3h legend | error bars are mean +/- SEM | Fig. 3h legend | Forskolin :<br>F[e5]<br>p=0.0489<br>t(2)=3.481<br>F=8.843<br>(sdP=0.2065)                                                                                                                  |                |  |  |
| +<br>- | 4a | Student's unpaired t-test                                         | Fig. 4a legend | 3,3,3 | For each TF knockdown group (CREB, MEF2A, NPAS4) n=3 consisting of 2.5 million cultured cortical neurons in each of the three trials (Scr KCl, shCREB un, shCREB KCl). | Fig. 4a legend | error bars are mean +/- SEM | Fig. 4a legend | CREB:<br>p=0.022<br>t(2)=6.600<br>F=27.833<br>(sdP=0.1192)<br>MEF2A:<br>p=0.0417<br>t(2)=4.741<br>F=11.189<br>(sdP=0.1849)<br>NPAS4:<br>p=0.0455<br>t(2)=4.524<br>F=28.538<br>(sdP=0.1178) | Fig. 4a legend |  |  |

|        |    |                           |                |         |                                                                                                                                                                                        |                |                             |                |                                                                                                                                                                                                                                                                        |                |  |  |
|--------|----|---------------------------|----------------|---------|----------------------------------------------------------------------------------------------------------------------------------------------------------------------------------------|----------------|-----------------------------|----------------|------------------------------------------------------------------------------------------------------------------------------------------------------------------------------------------------------------------------------------------------------------------------|----------------|--|--|
| +<br>- | 4b | Student's unpaired t-test | Fig. 4b legend | 3,3,3   | For each TF knockdown group (CREB, MEF2A, NPAS4) n=3 consisting of 2.5 million cultured cortical neurons in each of the trials (e1-e5).                                                | Fig. 4b legend | error bars are mean +/- SEM | Fig. 4b legend | CREB:<br>e2 p=0.0382<br>t(4)=3.046<br>F=1.078<br>(sdP=0.4813)<br>e5 p=0.04<br>MEF2A:<br>e2 p=0.0478<br>t(4)=2.820<br>F=3.517<br>(sdP=0.2214)<br>e5 p=0.0339<br>t(4)=3.169<br>F=2.995<br>(sdP=0.2503)<br>NPAS4:<br>e2 p=0.0164<br>t(2)=7.714<br>F=9.324<br>(sdP=0.2015) | Fig. 4b legend |  |  |
| +<br>- | 4c | Student's unpaired t-test | Fig. 4c legend | 3,3,3   | For each BDNF-mediated c-fos mRNA induction group (CREB, MEF2A, SRF) n=3 consisting of 2.5 million cultured cortical neurons.                                                          | Fig. 4c legend | error bars are mean +/- SEM | Fig. 4c legend | c-fos mRNA:<br>MEF2A<br>p=0.0010<br>t(4)=8.656<br>F=2.157<br>(sdP=0.3168)                                                                                                                                                                                              | Fig. 4c legend |  |  |
| +<br>- | 4d | Student's unpaired t-test | Fig. 4d legend | 3,3,3   | For each BDNF-mediated c-fos eRNA induction group (CREB, MEF2A, SRF) n=3 consisting of 2.5 million cultured cortical neurons in each of the trials (e1-e5).                            | Fig. 4d legend | error bars are mean +/- SEM | Fig. 4d legend | c-fos eRNA:<br>MEF2A<br>e4 p=0.0439<br>t(3)=2.906<br>F=8.631<br>(sdP=0.1038)<br>e5 p=0.0485<br>t(4)=2.807<br>F=5.381<br>(sdP=0.1567)                                                                                                                                   | Fig. 4d legend |  |  |
| +<br>- | 5a | Student's unpaired t-test | Fig. 5a legend | 3       | For each IEG mRNA group (c-fos, Arc, Gadd45b, Egr-1) n=3 consisting of 2.5 million cultured cortical neurons in each of the trials (CTL un, CTL KCl, CRISPRi TSS un, CRISPRi TSS KCl). | Fig. 5a legend | error bars are mean +/- SEM | Fig. 5a legend | c-fos mRNA:<br>p=0.0189<br>t(2)=12.637<br>F=4.830<br>(sdP=0.2718)                                                                                                                                                                                                      | Fig. 5a legend |  |  |
| +<br>- | 5b | Student's unpaired t-test | Fig. 5b legend | 2,3,2,2 | For each e1, e2, e4 and e5 enhancer-targeted CRISPRi, n=2,3,2,2 consisting of 2.5 million cultured cortical neurons in each of the trials (CTL un, CTL KCl or BDNF).                   | Fig. 5b legend | error bars are mean +/- SEM | Fig. 5b legend | c-fos eRNA:<br>e1 p=0.0151<br>t(2)=8.037<br>F=4.147<br>(sdP=0.2906)<br>e2 p=0.0393<br>t(4)=3.015<br>F=3.461<br>(sdP=0.2242)<br>e4 p=0.0206<br>t(2)=6.864<br>F=25.000<br>(sdP=0.1257)<br>e5 p=0.0104<br>t(2)=9.711<br>F=32.398<br>(sdP=0.1107)                          | Fig. 5b legend |  |  |

|        |    |                           |                |                                     |                                                                                                                                                        |                |                             |                |                                                                                                                                                                                                                                                                                                                                                                                                                                                                                                                                                                                                                                                         |                |  |
|--------|----|---------------------------|----------------|-------------------------------------|--------------------------------------------------------------------------------------------------------------------------------------------------------|----------------|-----------------------------|----------------|---------------------------------------------------------------------------------------------------------------------------------------------------------------------------------------------------------------------------------------------------------------------------------------------------------------------------------------------------------------------------------------------------------------------------------------------------------------------------------------------------------------------------------------------------------------------------------------------------------------------------------------------------------|----------------|--|
| +<br>- | 5c | Student's unpaired t-test | Fig. 5c legend | KCl:<br>3,5,2,2<br>BDNF:<br>2,2,2,2 | For each IEG group stimulated by KCl n=5 and for each IEG group stimulated by BDNF n=2. Each trial consisted of 2.5 million cultured cortical neurons. | Fig. 5c legend | error bars are mean +/- SEM | Fig. 5c legend | KCl:<br>CRISPRi e2<br>pre-mRNA<br>p=0.0433<br>t(4)=2.918<br>F=1.388<br>(sdP=0.4187)<br>CRISPRi e2<br>mRNA<br>p=0.0102<br>t(8)=3.340<br>F=1.114<br>(sdP=0.459)<br>CRISPRi e5<br>pre-mRNA<br>p=0.0077<br>t(2)=11.350<br>F=3.550<br>(sdP=0.3106)<br>CRISPRi e5<br>mRNA<br>p=0.0207<br>t(2)=6.845<br>F=1.122<br>(sdP=0.4817)<br>BDNF<br>CRISPRi e4<br>pre-mRNA<br>p=0.0485<br>t(2)=1.807<br>F=1.388<br>(sdP=0.4868)<br>CRISPRi e4<br>mRNA<br>p=0.0322<br>t(2)=5.440<br>F=137.97<br>(sdP=0.0541)<br>CRISPRi e5<br>pre-mRNA<br>p=0.0489<br>t(2)=4.353<br>F=17.288<br>(sdP=0.1503)<br>CRISPRi e5<br>mRNA<br>p=0.0223<br>t(2)=6.582<br>F=26.669<br>(sdP=0.1218) | Fig. 5c legend |  |
|--------|----|---------------------------|----------------|-------------------------------------|--------------------------------------------------------------------------------------------------------------------------------------------------------|----------------|-----------------------------|----------------|---------------------------------------------------------------------------------------------------------------------------------------------------------------------------------------------------------------------------------------------------------------------------------------------------------------------------------------------------------------------------------------------------------------------------------------------------------------------------------------------------------------------------------------------------------------------------------------------------------------------------------------------------------|----------------|--|

|        |    |                                                                   |                |         |                                                                                                      |                |                             |                |                                                                                                                                                                                                                                                                                                                                                                           |                |  |  |
|--------|----|-------------------------------------------------------------------|----------------|---------|------------------------------------------------------------------------------------------------------|----------------|-----------------------------|----------------|---------------------------------------------------------------------------------------------------------------------------------------------------------------------------------------------------------------------------------------------------------------------------------------------------------------------------------------------------------------------------|----------------|--|--|
| +<br>- | 6a | unpaired t-test with Welch correction                             | Fig. 6a legend | 5       | For c-fos mRNA and eRNA level in each brain region group (Cortex, Hippocampus, Cerebellum) n=5 mice. | Fig. 6a legend | error bars are mean +/- SEM | Fig. 6a legend | c-fos mRNA<br>Cortex:<br>p=0.0458<br>t(2)=4.511<br>Hippocampus:<br>p=0.0067<br>t(5)=4.455<br>Cerebellum:<br>p=0.0133<br>t(2)=47.767<br>c-fos eRNA<br>Cortex<br>e4<br>p=0.0150<br>t(4)=4.084<br>e5<br>p=0.034<br>t(4)=3.154<br>Hippocampus<br>e1<br>p=0.0386<br>t(4)=3.036<br>e2<br>p=0.0419<br>t(4)=2.717<br>e4<br>p=0.0211<br>t(4)=3.686<br>e5<br>p=0.0028<br>t(4)=5.454 | Fig. 6a legend |  |  |
| +<br>- | 6b | unpaired t-test with Welch correction                             | Fig. 6b legend | 3       | For c-fos mRNA fold induction and eRNA level in the visual cortex, n=3 mice.                         | Fig. 6b legend | error bars are mean +/- SEM | Fig. 6b legend | Visual cortex<br>c-fos mRNA<br>p=0.0069<br>t(2)=11.966<br>c-fos eRNA<br>e5<br>p=0.0485<br>t(4)=2.806                                                                                                                                                                                                                                                                      | Fig. 6c legend |  |  |
| +<br>- | 7b | Student's unpaired t-test / unpaired t-test with Welch correction | Fig. 7b legend | 4,4     | For c-fos mRNA and eRNA induction in the hippocampus following BDNF injection n=4 per group (mice)   | Fig. 7b legend | error bars are mean +/- SEM | Fig. 7b legend | c-fos mRNA - Hippocampus:<br>BDNF<br>p=0.0236<br>t(3)=4.267<br>c-fos eRNA<br>Hippocampus:<br>e4<br>p=0.0001<br>t(6)=10.373<br>F=5.082<br>(sdP=0.1074)<br>e5<br>p=0.0402<br>t(3)=3.475                                                                                                                                                                                     | Fig. 7b legend |  |  |
| +<br>- | 7c | Student's unpaired t-test                                         | Fig. 7c legend | 3,3,3,3 | For c-fos mRNA and eRNA induction in the hippocampus following KA induced seizure n=3 mice per group | Fig. 7c legend | error bars are mean +/- SEM | Fig. 7c legend | c-fos mRNA - Hippocampus:<br>WT-KA vs. BDNF KO-KA<br>p=0.0216<br>t(4)=3.660<br>F=3.756<br>(sdP=0.2103)<br>c-fos eRNA - Hippocampus:<br>e4<br>p=0.0476<br>t(4)=2.825<br>F=10.113<br>(sdP=0.0900)                                                                                                                                                                           | Fig. 7c legend |  |  |

|        |     |                                       |                 |               |                                                                                                                                                                             |                 |                             |                 |                                                                                                                                                                                                                                 |                 |  |  |
|--------|-----|---------------------------------------|-----------------|---------------|-----------------------------------------------------------------------------------------------------------------------------------------------------------------------------|-----------------|-----------------------------|-----------------|---------------------------------------------------------------------------------------------------------------------------------------------------------------------------------------------------------------------------------|-----------------|--|--|
| +<br>- | S2a | Student's unpaired t-test             | SFig. 2a legend | 3,3,3,3       | For each group of NIH 3T3 cell eRNA and mRNA level, n=3 and was measured at 4 different time-points.                                                                        | SFig. 2a legend | error bars are mean +/- SEM | SFig. 2a legend |                                                                                                                                                                                                                                 | SFig. 2a legend |  |  |
| +<br>- | S2b | unpaired t-test with Welch correction | SFig. 2b legend | 3,3           | For each individual enhancer activity measured by luciferase activity in NIH 3T3 cells, n=3.                                                                                | SFig. 2b legend | error bars are mean +/- SEM | SFig. 2b legend | Serum: e5 p=0.0075 t(2)=11.513                                                                                                                                                                                                  | SFig. 2b legend |  |  |
| +<br>- | S4  | unpaired t-test with Welch correction | SFig. 4 legend  | 3,3,3,3,3,3,3 | For fold induction of mRNA, n=3 in each group (SRF, MEF2C, CREB, MEF2A, NPAS4 and MEF2D). Each trial consisted of 2.5 million cultured cortical neurons.                    | SFig. 4 legend  | error bars are mean +/- SEM | SFig. 4 legend  | CREB: shCREB p=0.0031 t(2)=18.040<br>MEF2A: shMEF2A p=0.0029 t(2)=18.616<br>MEF2C: shMEF2C p=0.0019 t(2)=22.975<br>MEF2D: shMEF2D p=0.0012 t(2)=28.633<br>NPAS4: shNPAS4 p=0.0019 t(2)22.709<br>SRF: shSRF p=0.0014 t(2)=26.942 | SFig. 4 legend  |  |  |
| +<br>- | S5  | Student's unpaired t-test             | SFig. 5 legend  | 3,3,3,3,3,3   | For c-fos eRNA and mRNA level in each knockdown group (SRF, MEF2C and MEF2D) and stimulation condition, n=3. Each trial consisted of 2.5 million cultured cortical neurons. | SFig. 5 legend  | error bars are mean +/- SEM | SFig. 5 legend  |                                                                                                                                                                                                                                 |                 |  |  |
| +<br>- | S6  | Student's unpaired t-test             | SFig. 6 legend  | 3             | For each group of (MEF2A, MEF2D and MEF2C) mRNAs, n=3. Each trial consisted of 2.5 million cultured cortical neurons.                                                       | SFig. 6 legend  | error bars are mean +/- SEM | SFig. 6 legend  |                                                                                                                                                                                                                                 |                 |  |  |
| +<br>- | S7b | unpaired t-test with Welch correction | SFig. 7b legend | 2,2           | For each the cortical neuron culture and glial cell culture the trials consisted of 2.5 million cultured cells (n=2).                                                       | SFig. 7b legend | error bars are mean +/- SEM | SFig. 7b legend | Cortical neuron culture: p=0.0001 t(3)=37.044<br>Glial cell culture: p=0.0089 t(3)=6.084                                                                                                                                        | SFig. 7b legend |  |  |



|   |     |                           |                 |             |                                                                                                                                   |                 |                             |                 |                                                                                                                                                                                                                                                                                                                                                                                                                                                                                                                                                                                                                                                                                                                                                                                                                                                                                                                                                                                                                                                                                                                                                                                                                                                                                                                                                                                                                                                                                                                                                                                                                                                                                                                                                                                                                                                                                                                                                                                                                                                                                                                                                                                                                                                                |
|---|-----|---------------------------|-----------------|-------------|-----------------------------------------------------------------------------------------------------------------------------------|-----------------|-----------------------------|-----------------|----------------------------------------------------------------------------------------------------------------------------------------------------------------------------------------------------------------------------------------------------------------------------------------------------------------------------------------------------------------------------------------------------------------------------------------------------------------------------------------------------------------------------------------------------------------------------------------------------------------------------------------------------------------------------------------------------------------------------------------------------------------------------------------------------------------------------------------------------------------------------------------------------------------------------------------------------------------------------------------------------------------------------------------------------------------------------------------------------------------------------------------------------------------------------------------------------------------------------------------------------------------------------------------------------------------------------------------------------------------------------------------------------------------------------------------------------------------------------------------------------------------------------------------------------------------------------------------------------------------------------------------------------------------------------------------------------------------------------------------------------------------------------------------------------------------------------------------------------------------------------------------------------------------------------------------------------------------------------------------------------------------------------------------------------------------------------------------------------------------------------------------------------------------------------------------------------------------------------------------------------------------|
| + | S7c | Student's unpaired t-test | SFig. 7c legend | 2,2,2,2,2,2 | Expression of c-fos eRNA and mRNA in glial cells induced by KCl, BDNF, and Forskolin consisting of 2.5 million glial cells (n=2). | SFig. 7c legend | error bars are mean +/- SEM | SFig. 7c legend | <p>c-fos mRNA:<br/>                     KCl<br/>                     p=0.0239<br/>                     t(2)=6.346<br/>                     F=1.356<br/>                     (sdP=0.4517)<br/>                     BDNF<br/>                     p=0.0286<br/>                     t(2)=5.787<br/>                     F=28.667<br/>                     (sdP=0.1175)<br/>                     Forskolin<br/>                     p=0.0165<br/>                     t(2)=7.690<br/>                     F=50.055<br/>                     (sdP=0.0894)<br/>                     c-fos eRNA:<br/>                     BDNF:<br/>                     e1<br/>                     p=0.0283<br/>                     t(2)=5.817<br/>                     F=36.979<br/>                     (sdP=0.1038)<br/>                     e2<br/>                     p=0.0345<br/>                     t(2)=5.240<br/>                     F=11.137<br/>                     (sdP=0.1853)<br/>                     e3<br/>                     p=0.0195<br/>                     t(2)=7.063<br/>                     F=3.634<br/>                     (sdP=0.3076)<br/>                     e4<br/>                     p=0.0064<br/>                     t(2)=12.464<br/>                     F=17.529<br/>                     (sdP=0.1493)<br/>                     e5<br/>                     p=0.0025<br/>                     t(2)=19.845<br/>                     F=961.36<br/>                     (sdP=0.0571)<br/>                     .Forskolin:<br/>                     e2<br/>                     p=0.0312<br/>                     t(2)=5.527<br/>                     F=26.532<br/>                     (sdP=0.1221)<br/>                     e3<br/>                     p=0.0092<br/>                     t(2)=10.368<br/>                     F=2.869<br/>                     (sdP=0.3395)<br/>                     e4<br/>                     p=0.0042<br/>                     t(2)=15.928<br/>                     F=10.024<br/>                     (sdP=0.1948)<br/>                     e5<br/>                     p=0.0096<br/>                     t(2)=10.109<br/>                     F=1.775<br/>                     (sdP=0.4099)</p> |
| + | S8  | Student's unpaired t-test | SFig. 8 legend  | 3,3,3,3     | For each group of (Arc, Egr-1) mRNAs and KCl stimulation condition, n=3.                                                          | SFig. 8 legend  | error bars are mean +/- SEM | SFig. 8 legend  | <p>Arc mRNA:<br/>                     p=0.0481<br/>                     t(4)=2.814<br/>                     F=6.896<br/>                     (sdP=0.1267)</p>                                                                                                                                                                                                                                                                                                                                                                                                                                                                                                                                                                                                                                                                                                                                                                                                                                                                                                                                                                                                                                                                                                                                                                                                                                                                                                                                                                                                                                                                                                                                                                                                                                                                                                                                                                                                                                                                                                                                                                                                                                                                                                  |

|        |      |                                                                   |                  |       |                                                                                                                                                                                              |                  |                             |                  |                                                                                                                                                                                                                                                                                                                                                                                                                                                    |                 |  |  |
|--------|------|-------------------------------------------------------------------|------------------|-------|----------------------------------------------------------------------------------------------------------------------------------------------------------------------------------------------|------------------|-----------------------------|------------------|----------------------------------------------------------------------------------------------------------------------------------------------------------------------------------------------------------------------------------------------------------------------------------------------------------------------------------------------------------------------------------------------------------------------------------------------------|-----------------|--|--|
| +<br>- | S9   | Student's unpaired t-test / unpaired t-test with Welch correction | SFig. 9 legend   | 2,2,2 | For each stimulation condition (KCl, BDNF, Forskolin) cultures consisted of 2.5 million cortical neurons (n=2)                                                                               | SFig. 9 legend   | error bars are mean +/- SEM | SFig. 9 legend   | MEF2A Binding:<br>KCl:<br>e2<br>p=0.0466<br>t(1)=13.632<br>e5<br>p=0.0180<br>t(2)=8.355<br>F=6.548<br>(sdP=0.2372)<br>P<br>p=0.0228<br>t(2)=6.514<br>F=150.94<br>(sdP=0.0517)<br>BDNF:<br>e1<br>p=0.0135<br>t(2)=8.507<br>F=10.418<br>(sdP=0.1913)<br>e5<br>p=0.0419<br>t(2)=4.733<br>F=19.313<br>(sdP=0.1432)<br>P<br>p=0.0121<br>t(2)=8.997<br>F=136.89<br>(sdP=0.0543)<br>Forskolin:<br>P<br>p=0.0182<br>t(2)=7.313<br>F=90.055<br>(sdP=0.0668) | SFig. 9 legend  |  |  |
| +<br>- | S10  | Student's unpaired t-test                                         | SFig. 10 legend  | 3     | For e2 enhancer-targeted CRISPRi effect on other c-fos eRNA, n=3 consisting of 2.5 million cultured cortical neurons in each trial (CTL un, CTL KCl, CRISPRi e2 un, CRISPRi e2 KCl).         | SFig. 10 legend  | error bars are mean +/- SEM | SFig. 10 legend  | c-fos e2 eRNA:<br>p=0.0393<br>t(4)=3.015<br>F=3.461<br>(sdP=0.2242)                                                                                                                                                                                                                                                                                                                                                                                | SFig. 10 legend |  |  |
| +<br>- | S11  | Student's unpaired t-test                                         | SFig. 11 legend  | 2     | For cross-linking frequency of the c-fos enhancer 5 and promoter cultures consisted of 2.5 million cortical neurons for each condition CTL un, CTL KCl, CRISPRi e5 un, CRISPRi e5 KCl) (n=2) | SFig. 11 legend  | error bars are mean +/- SEM | SFig. 11 legend  | e5:<br>un vs. KCl<br>p=0.0117<br>t(2)=9.144<br>F=2.420<br>(sdP=0.3637)<br>KCl vs. CRISPRi e5 KCl<br>p=0.0453<br>t(2)=4.539<br>F=1.398<br>(sdP=0.4470)                                                                                                                                                                                                                                                                                              | SFig. 11 legend |  |  |
| +<br>- | S12a | Student's unpaired t-test                                         | SFig. 12a legend | 2,2   | For e1 enhancer-targeted CRISPRi effect on various IEGs, n=2 consisting of 2.5 million cultured cortical neurons in each trial.                                                              | SFig. 12a legend | error bars are mean +/- SEM | SFig. 12a legend |                                                                                                                                                                                                                                                                                                                                                                                                                                                    |                 |  |  |

|        |      |                           |                  |       |                                                                                                                                                |                  |                             |                  |                                                                                                                                                                                                                                                                         |                  |  |  |
|--------|------|---------------------------|------------------|-------|------------------------------------------------------------------------------------------------------------------------------------------------|------------------|-----------------------------|------------------|-------------------------------------------------------------------------------------------------------------------------------------------------------------------------------------------------------------------------------------------------------------------------|------------------|--|--|
| +<br>- | S12b | Student's unpaired t-test | SFig. 12b legend | 2,2   | For e2 enhancer-targeted CRISPRi effect on various IEGs, n=2 consisting of 2.5 million cultured cortical neurons in each trial.                | SFig. 12b legend | error bars are mean +/- SEM | SFig. 12b legend |                                                                                                                                                                                                                                                                         |                  |  |  |
| +<br>- | S12c | Student's unpaired t-test | SFig. 12c legend | 2,2   | For e4 enhancer-targeted CRISPRi effect on various IEGs, n=2 consisting of 2.5 million cultured cortical neurons in each trial.                | SFig. 12c legend | error bars are mean +/- SEM | SFig. 12c legend |                                                                                                                                                                                                                                                                         |                  |  |  |
| +<br>- | S12d | Student's unpaired t-test | SFig. 12d legend | 2,2   | For e5 enhancer-targeted CRISPRi effect on various IEGs, n=2 consisting of 2.5 million cultured cortical neurons in each trial.                | SFig. 12d legend | error bars are mean +/- SEM | SFig. 12d legend |                                                                                                                                                                                                                                                                         |                  |  |  |
| +<br>- | S13b | Student's unpaired t-test | SFig. 13b legend | 2,2,2 | For expression of PELL1 mRNA and eRNA in cortical neurons 2.5 million cultured cortical neurons were used in each trial (un, KCL, BDNF) (n=2). | SFig. 13b legend | error bars are mean +/- SEM | SFig. 13b legend | PELL1 mRNA:<br>KCL p=0.0076<br>t(2)=11.430<br>F=2.346<br>(sdP=0.3682)<br>BDNF<br>p=0.0388<br>t(4)=4.930<br>F=13.471<br>(sdP=0.1693)<br>PELL1 eRNA<br>KCL p=0.0318<br>t(2)=5.477<br>F=1.154<br>(sdP=0.4773)<br>BDNF<br>p=0.0392<br>t(2)=4.900<br>F=63.601<br>(sdP=0.080) | SFig. 13b legend |  |  |

|        |      |                                                  |                  |       |                                                                                                                                                |                  |                             |                  |                                                                                                                                                                                                                                                                                                                                                                                                                                 |                  |  |  |  |
|--------|------|--------------------------------------------------|------------------|-------|------------------------------------------------------------------------------------------------------------------------------------------------|------------------|-----------------------------|------------------|---------------------------------------------------------------------------------------------------------------------------------------------------------------------------------------------------------------------------------------------------------------------------------------------------------------------------------------------------------------------------------------------------------------------------------|------------------|--|--|--|
| +<br>- | S14b | Student's unpaired t-test                        | SFig. 14b legend | 2,2,2 | For expression of IGF-1 mRNA and eRNA in cortical neurons 2.5 million cultured cortical neurons were used in each trial (un, KCL, BDNF) (n=2). | SFig. 14b legend | error bars are mean +/- SEM | SFig. 14b legend | IGF-1 mRNA:<br>un vs. KCl 6h<br>p=0.0317<br>t(2)=5.486<br>F=3.435<br>(sdP=0.3150)<br>un vs. BDNF 6h<br>p=0.005<br>t(2)=14.092<br>F=1.686<br>(sdP=0.4178)<br>IGF-1 eRNA:<br>KCl:<br>e2:<br>un vs. KCl 6h<br>p=0.0280<br>t(2)=5.852<br>F=2.903<br>(sdP=0.3379)<br>e3:<br>un vs KCl 6h<br>p=0.0465<br>t(2)=4.520<br>F=1.161<br>(sdP=0.4762)<br>BDNF:<br>e1:<br>un vs. BDNF 6h<br>p=0.0224<br>t(2)=6.570<br>F=3.354<br>(sdP=0.3182) | SFig. 14b legend |  |  |  |
| +<br>- | S15  | Model                                            | Sfig. 15 legend  |       |                                                                                                                                                |                  |                             |                  |                                                                                                                                                                                                                                                                                                                                                                                                                                 |                  |  |  |  |
| +<br>- | S16  | Full blots of the western blots shown the figure | Sfig. 16 legend  |       |                                                                                                                                                |                  |                             |                  |                                                                                                                                                                                                                                                                                                                                                                                                                                 |                  |  |  |  |

## ► Representative figures

1. Are any representative images shown (including Western blots and immunohistochemistry/staining) in the paper?

If so, what figure(s)?

Yes, supplementary figure 6 and 16

2. For each representative image, is there a clear statement of how many times this experiment was successfully repeated and a discussion of any limitations in repeatability?

If so, where is this reported (section, paragraph #)?

Yes, in the legend for supplementary figure 6.

## ► Statistics and general methods

1. Is there a justification of the sample size?

If so, how was it justified?

Where (section, paragraph #)?

Even if no sample size calculation was performed, authors should report why the sample size is adequate to measure their effect size.

We used sample sizes that are similar to those used in the field, and this is stated under Statistical analyses in the methods section.

2. Are statistical tests justified as appropriate for every figure?

Where (section, paragraph #)?

Yes.

Figures 1, 2, 3, 5, 6, 7, and Supplementary Figures 2,4,5,6,7,8,9,10,11,12,13,14.

- a. If there is a section summarizing the statistical methods in the methods, is the statistical test for each experiment clearly defined?

Yes.

- b. Do the data meet the assumptions of the specific statistical test you chose (e.g. normality for a parametric test)?

Where is this described (section, paragraph #)?

Data distribution was assumed to be normal but this was not formally tested. This is stated under Statistical analyses in the methods section, paragraph 12.

- c. Is there any estimate of variance within each group of data?

Is the variance similar between groups that are being statistically compared?

Where is this described (section, paragraph #)?

Yes, the variance within each group was calculated. If the variance between the groups being statistically compared was not similar, then an unpaired t-test with a Welch correction was used in place of a standard unpaired student's t-test. This is stated under Statistical analyses in the methods section, paragraph 12.

- d. Are tests specified as one- or two-sided?

Two-sided

- e. Are there adjustments for multiple comparisons?

Yes

3. Are criteria for excluding data points reported?

Was this criterion established prior to data collection?

Where is this described (section, paragraph #)?

No, there were no data points excluded.

4. Define the method of randomization used to assign subjects (or samples) to the experimental groups and to collect and process data.

If no randomization was used, state so.

Where does this appear (section, paragraph #)?

Randomization was not used. This is stated under Statistical analyses in the methods section, paragraph 12.

5. Is a statement of the extent to which investigator knew the group allocation during the experiment and in assessing outcome included?

If no blinding was done, state so.

Where (section, paragraph #)?

Blinding was not done. This is stated under Statistical analyses in the methods section, paragraph 12.

6. For experiments in live vertebrates, is a statement of compliance with ethical guidelines/regulations included?  
Where (section, paragraph #)?
- All animal experiments performed in this study were reviewed and approved by the IACUC committee at UT Southwestern Medical Center. It is stated at the beginning of the methods section.
7. Is the species of the animals used reported?  
Where (section, paragraph #)?
- Yes. Reported under the Methods section, paragraph 6.
8. Is the strain of the animals (including background strains of KO/transgenic animals used) reported?  
Where (section, paragraph #)?
- Yes. Reported under the Methods section, paragraph 6.
9. Is the sex of the animals/subjects used reported?  
Where (section, paragraph #)?
- Yes. Reported under the Methods section, paragraph 6.
10. Is the age of the animals/subjects reported?  
Where (section, paragraph #)?
- Yes. Reported under the Methods section, paragraph 6.
11. For animals housed in a vivarium, is the light/dark cycle reported?  
Where (section, paragraph #)?
- Yes. Reported under the Methods section, paragraph 6.
12. For animals housed in a vivarium, is the housing group (i.e. number of animals per cage) reported?  
Where (section, paragraph #)?
- No.
13. For behavioral experiments, is the time of day reported (e.g. light or dark cycle)?  
Where (section, paragraph #)?
- Yes. Reported under the Methods section, paragraph 6.
14. Is the previous history of the animals/subjects (e.g. prior drug administration, surgery, behavioral testing) reported?  
Where (section, paragraph #)?
- Yes. Reported under the Methods section, paragraph 6.
- a. If multiple behavioral tests were conducted in the same group of animals, is this reported?  
Where (section, paragraph #)?
- No.
15. If any animals/subjects were excluded from analysis, is this reported?  
Where (section, paragraph #)?
- No animals were excluded from analysis.
- a. How were the criteria for exclusion defined?  
Where is this described (section, paragraph #)?
- N/A

- b. Specify reasons for any discrepancy between the number of animals at the beginning and end of the study.

N/A

Where is this described (section, paragraph #)?

## ► Reagents

1. Have antibodies been validated for use in the system under study (assay and species)?

Yes, the antibodies have been validated.

- a. Is antibody catalog number given?

Where does this appear (section, paragraph #)?

The antibody catalog numbers are not mentioned in the paper. However, they are:

Tuj-1 covance #801201  
 GFAP Sigma #G3893  
 alexa 488 Invitrogen #A21202  
 alexa 555 Invitrogen #A31570  
 b-actin Sigma #5441  
 Mef2c Proteintech #10056-AP

- b. Where were the validation data reported (citation, supplementary information, Antibodypedia)?

Where does this appear (section, paragraph #)?

The validation data of each antibody is listed in corresponding vendor's webpage. For MEF2A/D antibodies, see Flavell et al. Neuron 60, 1022-1038 (2008).

2. Cell line identity

- a. Are any cell lines used in this paper listed in the database of commonly misidentified cell lines maintained by [ICLAC](#) and [NCBI Biosample](#)?

Where (section, paragraph #)?

No.

- b. If yes, include in the Methods section a scientific justification of their use--indicate here in which section and paragraph the justification can be found.

- c. For each cell line, include in the Methods section a statement that specifies:

- the source of the cell lines
- have the cell lines been authenticated? If so, by which method?
- have the cell lines been tested for mycoplasma contamination?

Where (section, paragraph #)?

NIH 3T3 cells

Source: American Type Culture Collection (ATCC Manassas, VA, USA)

Authentication: DNA Sanger Sequencing Multiplex PCR Assay

Test: The cells have not been tested for mycoplasma contamination.

Methods section paragraph 5.

## ▶ Data deposition

Data deposition in a public repository is mandatory for:

- a. Protein, DNA and RNA sequences
- b. Macromolecular structures
- c. Crystallographic data for small molecules
- d. Microarray data

Deposition is strongly recommended for many other datasets for which structured public repositories exist; more details on our data policy are available [here](#). We encourage the provision of other source data in supplementary information or in unstructured repositories such as [Figshare](#) and [Dryad](#).

We encourage publication of Data Descriptors (see [Scientific Data](#)) to maximize data reuse.

1. Are accession codes for deposit dates provided?

Where (section, paragraph #)?

N/A

## ▶ Computer code/software

Any custom algorithm/software that is central to the methods must be supplied by the authors in a usable and readable form for readers at the time of publication. However, referees may ask for this information at any time during the review process.

1. Identify all custom software or scripts that were required to conduct the study and where in the procedures each was used.

2. If computer code was used to generate results that are central to the paper's conclusions, include a statement in the Methods section under "**Code availability**" to indicate whether and how the code can be accessed. Include version information as necessary and any restrictions on availability.

## ▶ Human subjects

1. Which IRB approved the protocol?

Where is this stated (section, paragraph #)?

2. Is demographic information on all subjects provided?

Where (section, paragraph #)?

3. Is the number of human subjects, their age and sex clearly defined?

Where (section, paragraph #)?

4. Are the inclusion and exclusion criteria (if any) clearly specified?

Where (section, paragraph #)?



5. How well were the groups matched?

Where is this information described (section, paragraph #)?

6. Is a statement included confirming that informed consent was obtained from all subjects?

Where (section, paragraph #)?

7. For publication of patient photos, is a statement included confirming that consent to publish was obtained?

Where (section, paragraph #)?

## ► fMRI studies

For papers reporting functional imaging (fMRI) results please ensure that these minimal reporting guidelines are met and that all this information is clearly provided in the methods:

1. Were any subjects scanned but then rejected for the analysis after the data was collected?

a. If yes, is the number rejected and reasons for rejection described?

Where (section, paragraph #)?

2. Is the number of blocks, trials or experimental units per session and/or subjects specified?

Where (section, paragraph #)?

3. Is the length of each trial and interval between trials specified?

4. Is a blocked, event-related, or mixed design being used? If applicable, please specify the block length or how the event-related or mixed design was optimized.

5. Is the task design clearly described?

Where (section, paragraph #)?

6. How was behavioral performance measured?

7. Is an ANOVA or factorial design being used?

8. For data acquisition, is a whole brain scan used?

If not, state area of acquisition.

a. How was this region determined?

9. Is the field strength (in Tesla) of the MRI system stated?
- a. Is the pulse sequence type (gradient/spin echo, EPI/spiral) stated?
- b. Are the field-of-view, matrix size, slice thickness, and TE/TR/flip angle clearly stated?
10. Are the software and specific parameters (model/functions, smoothing kernel size if applicable, etc.) used for data processing and pre-processing clearly stated?
11. Is the coordinate space for the anatomical/functional imaging data clearly defined as subject/native space or standardized stereotaxic space, e.g., original Talairach, MNI305, ICBM152, etc? Where (section, paragraph #)?
12. If there was data normalization/standardization to a specific space template, are the type of transformation (linear vs. nonlinear) used and image types being transformed clearly described? Where (section, paragraph #)?
13. How were anatomical locations determined, e.g., via an automated labeling algorithm (AAL), standardized coordinate database (Talairach daemon), probabilistic atlases, etc.?
14. Were any additional regressors (behavioral covariates, motion etc) used?
15. Is the contrast construction clearly defined?
16. Is a mixed/random effects or fixed inference used?
- a. If fixed effects inference used, is this justified?
17. Were repeated measures used (multiple measurements per subject)?
- a. If so, are the method to account for within subject correlation and the assumptions made about variance clearly stated?
18. If the threshold used for inference and visualization in figures varies, is this clearly stated?
19. Are statistical inferences corrected for multiple comparisons?
- a. If not, is this labeled as uncorrected?

20. Are the results based on an ROI (region of interest) analysis?

a. If so, is the rationale clearly described?

b. How were the ROI's defined (functional vs anatomical localization)?

21. Is there correction for multiple comparisons within each voxel?

22. For cluster-wise significance, is the cluster-defining threshold and the corrected significance level defined?

## ► Additional comments

---

Additional Comments
